1 **Isolation of SAR11 marine bacteria from cryopreserved seawater**

2

3 Elizabeth A. Monaghan<sup>a,b</sup>, Kelle C. Freel<sup>a</sup>, and Michael S. Rappé<sup>a#</sup>

4

5 <sup>a</sup>Hawai‘i Institute of Marine Biology, School of Ocean and Earth Science and Technology,

6 University of Hawai‘i at Mānoa, Kāne‘ohe, Hawai‘i, USA

7 <sup>b</sup>Marine Biology Graduate Program, University of Hawai‘i at Mānoa, Honolulu, Hawai‘i, USA

8

9 Running Title: Isolation of SAR11 from cryopreserved seawater

10

11 #Address correspondence to Michael S. Rappé, [rappe@hawaii.edu](mailto:rappe@hawaii.edu)

12

13

14

15 **Abstract**

16 In this study, we sought a means to increase current culture collections of SAR11 marine bacteria  
17 by testing the use of seawater cryopreserved with glycerol as an inoculum. In July 2017, raw  
18 seawater was collected outside of Kāneʻohe Bay, Hawai‘i, in the tropical Pacific Ocean. A  
19 portion of this sample was diluted in seawater-based growth medium to create  $576 \times 2$  mL  
20 dilution cultures containing 5 cells each and incubated for a high-throughput cultivation  
21 experiment, while another portion was cryopreserved in 10% glycerol. After ten months, a  
22 cryopreserved aliquot of seawater was thawed, diluted in seawater-based growth medium, and  
23 distributed to create a second high-throughput cultivation experiment of  $480 \times 2$  mL dilution  
24 cultures containing 5 cells each and 94 cultures containing 105 cells each. The raw seawater  
25 cultivation experiment resulted in the successful isolation of 54 monocultures and 29 mixed-  
26 cultures, while cryopreserved seawater resulted in 59 monocultures and 29 mixed cultures.  
27 Combined, the cultures included 51 SAR11 isolates spanning 11 unique 16S rRNA gene  
28 amplicon sequence variants (ASVs) from raw seawater inoculum and 74 SAR11 isolates  
29 spanning 13 unique ASVs from cryopreserved seawater. A vast majority (115 of 125) of SAR11  
30 isolates from the two HTC experiments were members of SAR11 subclade Ia, though isolates of  
31 subclades IIIa and Va were also recovered from cryopreserved seawater and subclade Ib was  
32 recovered from both. The four most abundant SAR11 subclade Ia ASVs found in the initial  
33 seawater sample used to create both culture experiments were isolated by both approaches.

34

35 **Importance**

36 High-throughput dilution culture has proved to be a successful approach to bring some difficult-  
37 to-isolate planktonic microorganisms into culture, including the highly abundant SAR11 lineage

38 of marine bacteria. While the long-term preservation of bacterial isolates by freezing in the  
39 presence of cryoprotectants such as glycerol has been shown to be an effective method of storing  
40 viable cells over long time periods (i.e. years), to our knowledge it had not previously been  
41 tested for its efficacy in preserving raw seawater for later use as inoculum for high-throughput  
42 cultivation experiments. We found that SAR11 and other abundant marine bacteria could be  
43 isolated from seawater that was previously cryopreserved for nearly 10 months, at a rate of  
44 culturability similar to that of the same seawater used fresh, immediately after collection. Our  
45 findings expand the potential of high-throughput cultivation experiments to include opportunities  
46 where immediate isolation experiments are impractical, allow for targeted isolation experiments  
47 from specific samples based on analyses such as microbial community structure, and enable  
48 cultivation experiments across a wide range of other conditions that would benefit from having  
49 source inoculum available over extended periods of time.  
50

## 51 **Introduction**

52           The rapid advancement of molecular tools to investigate marine microorganisms in their  
53 natural environment has led to unprecedented access to the genomic repertoire and transcription-  
54 and protein-based assessments of activity within natural microbial cells, populations, and  
55 communities (1, 2). It is currently feasible for a few liters of seawater to provide sequence data  
56 that reveals microbial population structure, the identities of microbial community members, and  
57 the presence and activity of potential metabolic functions they harbor (e.g. 3, 4). In recent years,  
58 however, the value of having cultivated representatives of numerically abundant and  
59 environmentally relevant microbial lineages has received renewed recognition (5–8). Access to  
60 isolated strains or low-diversity enrichments of marine microorganisms that are commonly found  
61 in the natural environment has provided a means to definitively test many hypotheses generated  
62 from environmental observations and experiments, as well as whole genome sequences useful  
63 for informing and guiding environmental genomics, transcriptomics, and proteomics research  
64 (e.g. 5, 6). The importance of cultivating environmentally-relevant microorganisms from pelagic  
65 marine ecosystems for laboratory-based experimentation is now generally appreciated. However,  
66 evidence provided by the sequencing of environmental DNA continues to support the conclusion  
67 that most of the microorganisms that appear to dominate pelagic marine ecosystems have not yet  
68 been cultivated from seawater (11).

69           Several different isolation methods and strategies have been developed in order to coax  
70 recalcitrant environmental microorganisms into laboratory culture (e.g 12–15). Among these  
71 novel approaches is an isolation technique based on dilution-to-extinction culturing methodology  
72 first developed by Button and colleagues (16). Although early dilution-to-extinction culturing  
73 studies resulted in cultures of novel oligotrophs (16–18), the dilution culture strategy was not



74 without limitations. For instance, the technique yielded only a small number of isolates, while  
75 requiring a significant amount of time and effort per experiment. The high-throughput culturing  
76 (HTC) approach is a variation of dilution-to-extinction culturing methodology tailored to  
77 facilitate rapid, high-throughput experiments with high rates of replication and greater  
78 opportunities to investigate physical, chemical, and biological variables (19, 20).

79         For over a decade since its initial discovery in 1990, the marine planktonic bacterial  
80 lineage known as SAR11 served as a notorious example of an abundant and widespread  
81 microorganism in nature that was recalcitrant to cultivation as an isolated strain in a controlled  
82 laboratory setting (21, 22). The value of the HTC strategy was solidified when early trials  
83 yielded the first cultured representatives of many marine microbial groups that were previously  
84 known only from environmental SSU rRNA genes (19), including the first cultivated strains of  
85 SAR11 (20). In general, the HTC approach employs growth media created from natural or  
86 artificial seawater in order to dilute the cells within a fluid sample, which is then arrayed in high  
87 density replicate cultures, propagated, and monitored under controlled conditions. In addition to  
88 diverse SAR11 strains (20, 23–28), the application of this method has resulted in the isolation of  
89 numerous other important lineages of marine bacteria including OM43 (19, 29), SAR116 (23,  
90 30), SAR92 (23, 31), and SUP05 (32), among others. While efforts have succeeded in isolating  
91 many abundant planktonic marine bacteria, it remains that the genetic diversity harbored by these  
92 lineages in nature greatly surpasses what has been isolated in the laboratory.

93         A current limitation of the HTC approach is that, thus far, it has only been used with  
94 freshly collected inoculum. This presents a potential constraint on HTC experiments using fluid  
95 samples collected in the field as it requires all of the resources necessary for setting up an HTC  
96 experiment (appropriate laboratory space, biosafety cabinet, etc.) be available at or near the time

97 and location of sampling. The preservation of cultivated bacterial strains by freezing in the  
98 presence of cryoprotectants such as glycerol or dimethyl sulfoxide (DMSO) has proved an  
99 effective method for preserving viable cells over long time periods (i.e. years), including  
100 cultivated strains of SAR11 (20, 33, 34). However, to our knowledge it has not previously been  
101 tested for its efficacy in preserving raw seawater for subsequent use as inoculum for high-  
102 throughput cultivation. In this study, we conducted HTC experiments to compare the use of a  
103 raw seawater sample collected from the coast of O‘ahu, Hawai‘i, in the tropical Pacific Ocean,  
104 with a subsample of the same seawater that was cryogenically preserved for nearly ten months.  
105 In particular, we sought to determine if members of the SAR11 lineage of marine bacteria could  
106 be isolated from cryopreserved seawater and thus open the possibility to expand existing culture  
107 collections of SAR11 to potentially include any locations where seawater samples could be  
108 collected and preserved.  
109

## 110 **Results**

### 111 **Overview of HTC cultivation experiments**

112       Using seawater sampled outside of Kāneʻohe Bay on the island of Oʻahu, Hawaiʻi (Fig.  
113 1), two high-throughput cultivation experiments were conducted: one that used fresh seawater as  
114 an inoculum, labeled HTC2017, and one that used a cryopreserved sample of the same seawater  
115 ~10 months later (HTC2018) (Fig. 2). Of 576 initial 2 mL cultures inoculated with raw seawater  
116 for the HTC2017 experiment, 150 exhibited positive growth after 56 days of incubation. Of  
117 these, 123 contained sufficient volume of culture to be sub-cultured into 20 mL of fresh medium.  
118 Following DNA extraction, sequencing, and the assignment of ASVs, 54 monocultures and 29  
119 mixed cultures were recovered (Table 1). The remainder either did not yield an amplification  
120 product or did not contain an ASV  $\geq 50\%$  of the culture and thus were not considered further.  
121 Fifty-four isolates were identified in the 29 mixed cultures (Table S1); the 108 unique isolates  
122 identified in the HTC2017 experiment (monocultures plus isolates contained in mixed cultures)  
123 were distributed amongst 28 ASVs in total (Table 2, Table S1). The HTC2017 experiment  
124 yielded a culturability of 3.1% (2.5% – 3.9%) when both monocultures and mixed cultures were  
125 considered, and 2.0% (1.5% – 2.6%) when considering only monocultures (Table 1).

126       For the cryopreserved seawater experiment (HTC2018), wells were inoculated with either  
127 5 or 105 cells. Of the 480 initial 2 mL cultures inoculated with 5 cells well<sup>-1</sup> of cryopreserved  
128 seawater (HTC2018), 142 exhibited positive growth after 30 days of incubation. The 142  
129 positive wells were subcultured into 20 mL seawater media and, after 72 days, 95 subcultures  
130 ultimately exhibited growth. Following DNA extraction, sequencing, and the assignment of  
131 ASVs, 39 monocultures and 11 mixed cultures were identified (Table 1). The remainder either  
132 did not yield an amplification product or did not contain an ASV  $\geq 50\%$  of the culture and thus

133 were not considered further. Sixteen isolates were identified in the 11 mixed cultures (Table S1).  
134 Combined, the 55 unique isolates identified in the HTC2018 5 cells well<sup>-1</sup> experiment were  
135 distributed amongst 17 ASVs (Table 2, Table S1). The HTC2018 5 cells well<sup>-1</sup> experiment  
136 yielded a culturability of 2.2% (1.7% – 2.9%) when both monocultures and mixed cultures were  
137 considered, and 1.7% (1.2% – 2.3%) when considering only monocultures (Table 1).

138         Of the 470 initial 2 mL cultures inoculated with 105 cells well<sup>-1</sup> of cryopreserved  
139 seawater (HTC2018), 343 exhibited positive growth after 31 days of incubation. A single 96-  
140 well cultivation plate containing 64 positive wells and two uninoculated control wells were  
141 selected for further processing. Following DNA extraction, sequencing, and the assignment of  
142 ASVs, 20 monocultures and 18 mixed cultures were identified (Table 1). The remainder either  
143 did not yield an amplification product or did not contain an ASV  $\geq$  50% of the culture and thus  
144 were not considered further. Thirty-five isolates were identified in the 18 mixed cultures (Table  
145 S1); combined, the 55 unique isolates identified in the 105 cells well<sup>-1</sup> HTC2018 experiment  
146 were distributed amongst 21 ASVs (Table 2, Table S1). The HTC2018 105 cells well<sup>-1</sup>  
147 experiment yielded a culturability of 0.5% (0.3% – 0.7%) when both monocultures and mixed  
148 cultures were considered, and 0.2% (0.1% – 0.4%) when considering only monocultures (Table  
149 1).

150

### 151 **Identity of isolates**

152         After quality control, each culture was sequenced to an average depth of  $14,047 \pm 8,014$   
153 (s.d.; range of 679 – 57,557) reads. Regardless of whether they originated from raw or  
154 cryopreserved seawater, the broad, bacterial family-level taxonomic identity of isolates revealed  
155 substantial overlap between culture experiments (Table 2, Table S1). Members of the

156 alphaproteobacterial SAR11 subclade I, the marine gammaproteobacterial family *Haliaceae*,  
157 and the alphaproteobacterial family *Rhodobacteraceae* were the first-, second-, and third-most  
158 abundant families isolated in both the fresh seawater (HTC2017) and cryopreserved seawater  
159 (HTC2018) cultivation experiments (Table 2, Table S1). Combined, these three groups made up  
160 82% (89 of 108) and 88% (97 of 110) of isolates recovered from HTC2017 and HTC2018,  
161 respectively. Other bacterial families with isolates shared between HTC2017 and HTC2018  
162 include the PS1 clade of *Alphaproteobacteria* and *Burkholderiaceae* within the  
163 *Betaproteobacteria* (Table 2, Table S1). When the five bacterial families shared between  
164 HTC2017 and HTC2018 are considered, the fresh seawater and cryopreserved seawater  
165 cultivation experiments shared 89% (96 of 108) and 93% (102 of 110) of isolated strains,  
166 respectively.

167       **SAR11.** A total of 51 strains representing 11 unique ASVs of SAR11 marine bacteria  
168 (alphaproteobacterial order *Pelagibacterales*) were cultivated in HTC2017, while 74 strains  
169 representing 13 ASVs were cultivated in HTC2018 (Fig. 3, Table 2, Table S1). They make up  
170 47% and 67% of the isolates recovered in the two experiments, respectively. The vast majority of  
171 these isolates were members of SAR11 subclade Ia, including 47 strains from HTC2017 and 68  
172 strains from HTC2018. Each experiment resulted in the isolation of nine subclade Ia ASVs,  
173 including five that were common between the two experiments (Figs. 3 & 4, Table S1). The two  
174 most often isolated SAR11 subclade Ia ASVs were shared between the two experiments:  
175 ASV003 (25 and 37 isolates) and ASV002 (11 and 13 isolates) from HTC2017 and HTC2018,  
176 respectively (Fig. 3, Table S1). Two other subclade Ia ASVs (ASV034 and ASV046) consisted  
177 of multiple strains from both experiments, while 7 subclade Ia ASVs consisted of a single isolate  
178 from one experiment (Fig. 3, Table S1).

179 Strains affiliated with SAR11 subclade Ib were also isolated from both fresh and  
180 cryopreserved seawater, including 4 isolates across 2 ASVs from HTC2017 and 3 isolates across  
181 2 ASVs from HTC2018 (Fig. 4, Table S1). SAR11 subclade Ib ASV060 consisted of 3 and 2  
182 isolates from HTC2017 and HTC2018, respectively, while each experiment also yielded an  
183 isolate with a unique subclade Ib ASV (Fig. 3, Table S1). Two SAR11 subclades were only  
184 isolated from the cryopreserved seawater sample, including two isolates from subclade IIIa  
185 (ASV188) and one isolated from subclade Va (ASV200) (Fig. 3, Table 2, Table S1).

186 **OM60(NOR5).** Within the gammaproteobacterial family *Haliaceae*, the marine  
187 OM60(NOR5) clade made up 24 and 21 isolates, or 22% and 19% of HTC2017 and HTC2018,  
188 respectively (Table 2). The 4 ASVs that accounted for the 24 isolates from HTC2017 were  
189 shared with HTC2018, where they accounted for 19 of the 21 isolates recovered from that  
190 experiment (Fig. 5, Table S1). One additional OM60(NOR5) ASV (ASV201) consisting of 2  
191 isolates was recovered from cryopreserved seawater (Fig. 5, Table S1). Two closely related  
192 ASVs (ASV032 and ASV018) accounted for most of the OM60(NOR5) strains isolated from  
193 both experiments of this study (Fig. 5, Table S1). ASV32 was identical to strain HIMB55, a  
194 genome-sequenced member of the OM60(NOR5) clade previously isolated from Kāneʻohe Bay,  
195 Hawaiʻi (35).

196 **Rhodobacteraceae.** The marine alphaproteobacterial family *Rhodobacteraceae* made up  
197 14 and 5 isolates, or 13% and 5% of HTC2017 and HTC2018, respectively (Table 2). The strains  
198 were distributed amongst 4 (HTC2017) and 5 (HTC2018) ASVs, including three (ASV12,  
199 ASV71, ASV124) that were shared between the two experiments (Fig. 5, Table S1). Eight of 14  
200 *Rhodobacteraceae* isolates recovered from HTC2107 belonged to a single ASV (ASV012).

201 ASV71 was identical to strain HIMB11, a genome-sequenced member of the *Rhodobacteraceae*  
202 previously isolated from Kāneʻohe Bay, Hawaiʻi (Fig. 5) (36).

203 **Other isolates.** In addition to the SAR11, OM60(NOR5), and *Rhodobacteraceae* ASVs  
204 described above, one additional ASV was isolated in both experiments: ASV190 within the  
205 betaproteobacterial family *Burkholderiaceae* was represented by 4 strains in HTC2017 and 1 in  
206 HTC2018 (Table S1). While identical ASVs were not isolated, members of the marine  
207 alphaproteobacterial PS1 clade within the order *Parvibaculales* were recovered from both  
208 cultivation experiments, including 3 isolates from a single ASV (ASV137) in HTC2017 and 4  
209 isolates from 3 ASVs in HTC2018 (Fig. 5, Table S1). The remaining ASVs were recovered as  
210 either singletons or pairs of strains except for the OM43 clade of the *Betaproteobacteriales*,  
211 which constituted five strains across 2 ASVs from the fresh seawater inoculum (HTC2017) only  
212 (Table S1).

213

#### 214 **Comparisons with inoculum microbial community**

215 After quality control, the 16S rRNA gene amplicon from the inoculum seawater sample  
216 was sequenced to a depth of 65,924 reads. This sample harbored a microbial community  
217 dominated by typical marine bacteria, including the marine picocyanobacteria *Prochlorococcus*  
218 and *Synechococcus*, multiple subclades of the SAR11 lineage, the family *Flavobacteriaceae* of  
219 the bacterial phylum *Bacteroidetes*, diverse members of the gammaproteobacterial SAR86 and  
220 OM60(NOR5) lineages and alphaproteobacterial SAR116 and *Rhodobacteraceae* lineages, and  
221 *Actinomarinaceae* of the bacterial phylum *Actinobacteria*, among others (Table S1).

222 Within the inoculum sample, 53 SAR11 ASVs totaling 26% of the microbial community  
223 were identified. These spanned a diverse array of subclades that included Ia, Ib, IIa, IIIa, IV, Va,

224 and Vb (Fig. 3, Table S1). Eight of the 53 SAR11 ASVs were isolated from at least one  
225 cultivation experiment, including ASVs within subclades Ia, Ib, IIIa, and Va, while 5 of the 8  
226 were isolated from both HTC2017 and HTC2018 (Figs. 3 & 4, Table S1). Of 10 SAR11 subclade  
227 Ia ASVs present in the inoculum, the four most abundant were cultivated from both experiments  
228 (ASV002, ASV003, ASV034, and ASV046), including the second- and third- most abundant  
229 individual ASVs in the inoculum seawater community (Table S1). A fifth was cultivated in  
230 HTC2017 only (Fig. 3, Table S1). Eight SAR11 subclade Ia ASVs were isolated that did not  
231 appear in the inoculum seawater community (Figs. 3 & 4, Table S1).

232 In contrast to SAR11 subclade Ia, other SAR11 subclades present in the inoculum  
233 seawater microbial community were cultivated rarely or not at all. For example, only 1 of 14  
234 subclade Ib ASVs that appeared in the inoculum was isolated (ASV060; Fig. 3, Table S1),  
235 although it was cultivated in both HTC2017 and HTC2018 experiments. From the HTC2018  
236 experiment, one of four subclade IIIa ASVs (ASV188) was isolated, as well as one of two  
237 subclade Va ASVs (ASV200; Fig. 3, Table S1). Thirteen *Rhodobacteraceae* ASVs were  
238 identified in the environmental sample, of which the same three (ASV012, ASV071, ASV124)  
239 were cultivated from both fresh and cryopreserved seawater (Fig. 5, Table S1). Four of the five  
240 total most environmentally abundant OM60(NOR5) clade ASVs were also cultivated in both  
241 experiments (Table S1). Despite 19 ASVs appearing in the inoculum, only one SAR116 ASV  
242 (ASV142; Fig. 5, Table S1) was cultivated in the HTC2017 experiment.

243

#### 244 **Mixed cultures**

245 Twenty-nine mixed cultures were identified within each of the HTC2017 and HTC2018  
246 experiments, yielding a total of 58 mixed cultures (Table S1). A majority of the mixed cultures



247 contained ASVs from either SAR11 subclade Ia or the OM60(NOR5) clade, which is logical  
248 given the high recovery of monocultures from these two groups in both cultivation experiments  
249 (Fig. S1). Of nine mixed cultures containing OM60(NOR5) ASV018, eight also contained  
250 SAR11 subclade Ia ASV002, ASV003, or ASV034 (Fig. S1, Table S1). Eight of the 11 mixed  
251 cultures containing OM60(NOR5) ASV032 also contained a SAR11 subclade Ia ASV as well  
252 (Fig. S1, Table S1). All cultivated OM43 clade ASVs were in mixed cultures; both of the OM43  
253 clade ASV202 isolates appeared in co-culture with the OM43 clade ASV195 (Fig. S1, Table S1).  
254

255 **Discussion**

256 For a variety of reasons, SAR11 marine bacteria remain a target for culturing  
257 experiments, despite being first isolated nearly 20 years ago (20). In large part, this is driven by  
258 the enormous genomic diversity harbored by this lineage and the probability for ecotypic  
259 differentiation across the SAR11 phylogenetic tree (3, 26, 37, 38). Living cultures offer a direct  
260 means to characterize and quantify the cellular and physiological features that underly  
261 differences in abundance or activity observed via direct environmental sampling (4, 39, 40). The  
262 primary goal of this study was to test the hypothesis that SAR11 marine bacteria can be isolated  
263 from cryogenically preserved seawater. We reasoned that, since existing SAR11 isolates could  
264 be cryopreserved in the presence of 10% glycerol (e.g. 20, 33, 34), then there was no *a priori*  
265 reason to believe that natural populations of SAR11 cells could not similarly be preserved. One  
266 of many unknown variables, however, was whether or not the process of cryopreservation would  
267 result in significant cell loss and thus affect cultivation efficiency. At an equivalent-sized  
268 inoculum of five cells, we found that not only were SAR11 strains able to be cultivated from  
269 cryopreserved seawater, but the overall culturability was similar between the fresh and  
270 cryopreserved seawater samples. Both experiments resulted in the isolation of representatives  
271 from the four most abundant SAR11 subclade Ia ASVs in the original inoculum seawater  
272 sample, as well as strains from subclade Ib. The cryopreserved seawater sample also proved  
273 capable of serving as an inoculum to isolate other SAR11 subclades, as evidenced by the  
274 recovery of isolates from within subclade IIIa (two strains) and Va (one strain) from the  
275 cryopreserved sample only.

276 In addition to numerous isolates from SAR11 subclade Ia that appear to represent  
277 abundant ASVs in the seawater sample used as inoculum for these experiments, this study

278 yielded seven strains of SAR11 subclade Ib in either mono- or mixed-culture. Despite being a  
279 widespread and frequently abundant lineage of SAR11 in the global surface ocean (41–43), only  
280 one cultivated representative of subclade Ib had been previously reported, from the Red Sea (28).  
281 In addition to the novel isolates of subclade Ib, two strains of subclade IIIa and one of Va were  
282 isolated from cryopreserved seawater indicating that a broad range of SAR11 diversity covering  
283 at least four major sublineages can be cultivated by this approach, with no apparent negative  
284 affect from the cryopreservation treatment itself.

285         As demonstrated by their recovery here, a range of other oligotrophic marine bacteria can  
286 be isolated from cryopreserved seawater coupled with an HTC approach. This includes  
287 representatives from the OM60(NOR5) clade, a ubiquitous lineage of oligotrophic marine  
288 *Gammaproteobacteria* (OMG) that has been consistently isolated via HTC approaches (e.g. 19,  
289 27, 31), including from coastal Hawai‘i (35). The OM60(NOR5) lineage was the second most-  
290 commonly isolated group of marine bacteria, behind only SAR11 subclade Ia, whether using  
291 fresh or cryopreserved seawater as inoculum. Of five OM60(NOR5) ASVs present in the  
292 seawater used as inoculum, the four most abundant were isolated in both cultivation experiments,  
293 indicating no apparent effect of using cryopreserved seawater as an inoculum for isolating  
294 members of the OM60(NOR5) lineage. A similar pattern emerged for the *Rhodobacteraceae*  
295 lineage of marine *Alphaproteobacteria*, where isolates from the same three ASVs were  
296 recovered in each of the two cultivation experiments, out of 13 total *Rhodobacteraceae* ASVs  
297 identified in the environmental sample. This included the most abundant *Rhodobacteraceae* ASV  
298 from the seawater inoculum, as well as an ASV identical to the previously isolated and genome-  
299 sequenced strain HIMB11 from the same sampling location (36). We found only one abundant  
300 (> 3) set of strains that was isolated by using raw seawater as inoculum without corresponding

301 strains also isolated using cryopreserved seawater: five strains belonging to two ASVs within the  
302 OM43 clade of *Betaproteobacteria* were isolated in mixed- and mono-cultures. While this may  
303 indicate that the cryopreservation process had a negative impact on the viability of OM43 clade  
304 cells, we note that previously isolated members of this lineage have been successfully  
305 cryopreserved in an identical fashion to the method employed in the current study (29, 44). Thus,  
306 there is also the potential that this difference stems from stochasticity related to diluting the two  
307 inocula nearly one million-fold.

308         Combining a barcoded next-generation 16S rRNA gene amplicon sequencing approach  
309 with a high-throughput dilution culture strategy proved to be a rapid and sensitive means with  
310 which to identify strains and assess the constituent taxa within mixed cultures. By barcoding and  
311 sequencing each individual culture in the same manner as if it were a mixed microbial  
312 community, we obtained taxonomic and proportional data on the microorganisms growing within  
313 58 mixed cultures of up to four constituent ASVs. Recent studies have highlighted the intricacies  
314 that interweave the metabolisms of microorganisms inhabiting seawater (e.g. 4, 45); in natural  
315 systems, it is probable that a portion of marine microorganisms require as-yet-unidentified  
316 growth factors from co-existing cells (46, 47). These dependencies can be identified and  
317 investigated by combining a miniaturized, high-throughput approach to cultivate and screen 100s  
318 to 1000s of dilution cultures with an inoculum size aimed at growing mixed consortia and a rapid  
319 sequence-based screening method that is appropriate for mixed communities, like the one used  
320 here.

321         Consistent with recent observations (27), this set of experiments resulted in the isolation  
322 of several bacterioplankton lineages that have been isolated numerous times via HTC and thus  
323 appear readily amenable to cultivation via this approach, including members of SAR11 subclade

324 Ia, the OM60(NOR5) lineage, and the *Rhodobacteraceae*. However, it remains that a large  
325 portion of the diversity of marine microbes is still being missed in contemporary cultivation  
326 efforts. For example, when considering only the putatively heterotrophic, non-cyanobacterial  
327 fraction of the microbial community targeted in this study, major lineages including the  
328 *Flavobacteriaceae*, SAR86 clade, *Marinimicrobia* (SAR406 clade), and marine Actinobacteria  
329 (*Candidatus Actinomarina*) were missed completely. At the single-nucleotide resolution of  
330 ASVs, abundant lineages of SAR116 and SAR11 subclades Ib, IIa, and Vb were also  
331 conspicuously missed. While this study does not offer a panacea for isolating any of these well-  
332 known but as-yet-uncultivated (or undercultivated) lineages in laboratory culture, it presents a  
333 method by which high-throughput isolation experiments can be repeatedly performed on an  
334 identical set of cryopreserved seawater samples such that requirements for growth can be  
335 systematically tested in a cumulative fashion.

336 In summary, we have demonstrated that a broad range of marine bacterioplankton taxa  
337 can be isolated from glycerol-cryopreserved seawater via an HTC approach, and that the  
338 cryopreservation process itself did not negatively affect culturability or influence the taxonomic  
339 identify of the resulting isolates. Strains of SAR11 subclades Ia, Ib, IIIa, and Va are amenable to  
340 isolation from cryopreserved seawater, as well as other abundant lineages of marine bacteria  
341 such as OM60(NOR5), oligotrophic *Rhodobacteraceae*, and the PS1 clade. This study  
342 demonstrates that cryopreserved seawater can be used as a means to expand the breadth of HTC  
343 studies to anywhere cryopreserved stocks can be made, and opens new opportunities to  
344 repeatedly interrogate individual water samples or selectively target specific samples for  
345 cultivation once ancillary data is in hand.

346

## 347 **Materials and Methods**

### 348 **Processing of seawater for growth experiments**

349 On 26 July 2017, a 4 L seawater sample was collected in an acid washed polycarbonate  
350 (PC) bottle from a depth of 2 m at station STO1 (N 21° 28.974', W 157° 45.978') outside of  
351 Kāneʻohe Bay, Oʻahu, Hawaiʻi (Fig. 1). Within 1 hr of collection, subsamples of the raw  
352 seawater were used to enumerate planktonic microorganisms, cryopreserve subsamples, collect  
353 microbial biomass for environmental DNA, and serve as inoculum for a high-throughput  
354 cultivation experiment (Fig. 2). Microbial cells were enumerated by staining with SYBR Green I  
355 nucleic acid stain (Invitrogen, Carlsbad, CA, USA) and counted on a Guava easyCyte 5HT flow  
356 cytometer (Millipore, Burlington, MA, USA) following a previously published protocol (48). To  
357 cryopreserve the raw seawater, individual 1.5 mL subsamples were added to 375 µL of 50%  
358 glycerol solution (v/v in sterile Kāneʻohe Bay seawater; 10% final concentration) in 2 mL  
359 cryovials (Nalgene, Rochester, NY, USA) at room temperature (24°C), mixed by inverting, and  
360 cooled at a rate of -1°C min<sup>-1</sup> with a Cryo 1°C Freezing Container (Nalgene) inside a -80°C  
361 ultracold freezer. Approximately 1.3 L of the raw seawater sample was collected on a 25 mm  
362 diameter, 0.1 µm pore-sized polyethersulfone membrane (Supor-100; Pall Gelman Inc., Ann  
363 Arbor, MI). The filter was submerged in 500 µL DNA lysis buffer (49, 50) and stored at -80°C  
364 until DNA extraction.

365

### 366 **High-throughput cultivation experiment with raw seawater**

367 Growth medium was made following previously published methods (51). Briefly, 20 L  
368 seawater samples were collected on 8 July 2017 and subsequently again on 20 September 2017  
369 from a depth of 2 m at station SR4 (N 21° 46.165', W 157° 78.350') near Kāneʻohe Bay, Oʻahu,

370 Hawai‘i (Fig. 1), in acid-washed 4-L PC bottles. Within 1 hr of collection, the seawater was  
371 sequentially filtered through pre-rinsed (10 L sterile water followed by 10 L seawater) 0.8-, 0.2-,  
372 and 0.1- $\mu\text{m}$  pore-sized polyethersulfone (PES) membranes (AcroPak 20 and Supor 100; Pall  
373 Corp., Port Washington, NY, USA) into clean 4-L PC bottles. Bottles were then autoclaved for 3  
374 hours (h) at 121°C and allowed to cool. The sterile seawater was sparged with CO<sub>2</sub>, followed by  
375 air, through three in-line HEPA vent filters (0.3- $\mu\text{m}$  glass-fiber to 0.2- $\mu\text{m}$  PTFE to 0.1- $\mu\text{m}$   
376 PTFE; Whatman, GE Healthcare Life Sciences, Chicago, IL, USA) and stored at 4°C until use.  
377 The pH of the seawater was checked prior to autoclaving and after sparging to ensure continuity  
378 of the inorganic carbon chemistry.

379         Subsamples of raw seawater were diluted in the sterile seawater to 2.5 cells mL<sup>-1</sup> and  
380 arrayed in 2 mL volumes (5-cell inoculum) into 576 wells of custom fabricated 96-well Teflon  
381 microtiter plates. Plates were sealed with breathable polypropylene microplate adhesive film  
382 (VWR, Radnor, PA, USA) and incubated at 27°C in the dark. The presence of cellular growth  
383 was monitored at 3.5 and 8 weeks via flow cytometry (Tripp et al. 2008). This experiment is  
384 hereafter referred to as HTC2017.

385         Wells that exhibited positive growth of >10<sup>4</sup> cells mL<sup>-1</sup> were sub-cultured by transferring  
386 1 mL into 20 mL of sterile seawater media amended with 400  $\mu\text{M}$  (NH<sub>4</sub>)<sub>2</sub>SO<sub>4</sub>, 400  $\mu\text{M}$  NH<sub>4</sub>Cl,  
387 50  $\mu\text{M}$  NaH<sub>2</sub>PO<sub>4</sub>, 1  $\mu\text{M}$  glycine, 1  $\mu\text{M}$  methionine, 50  $\mu\text{M}$  pyruvate, 800 nM niacin (B3), 425  
388 nM pantothenic acid (B5), 500 nM pyridoxine (B6), 4 nM biotin (B7), 4 nM folic acid (B9), 6  
389  $\mu\text{M}$  myo-inositol, 60 nM 4-aminobenzoic acid, and 6  $\mu\text{M}$  thiamine hydrochloride (B1).

390 Subcultures were subsequently incubated at 27°C in the dark and monitored for growth after 4.5  
391 weeks. Those that again reached >10<sup>4</sup> cells mL<sup>-1</sup> were cryopreserved (500  $\mu\text{L}$  of culture with  
392 10% v/v glycerol, final concentration) in the same manner as described for raw seawater. Cells in

393 the remaining volume of culture (~18 mL) were collected by filtration through 13 mm diameter,  
394 0.03  $\mu\text{m}$  pore-sized PES membrane filters (Sterlitech, Kent, WA, USA), submerged in 250  $\mu\text{L}$   
395 DNA lysis buffer, and stored at  $-80^{\circ}\text{C}$  until DNA extraction.

396

### 397 **High-throughput cultivation experiment with cryopreserved seawater**

398 After 42 weeks of storage at  $-80^{\circ}\text{C}$ , one cryopreserved stock of raw seawater from station  
399 STO1 was thawed to room temperature ( $\sim 24^{\circ}\text{C}$ ), diluted ten-fold in sterile seawater growth  
400 medium, and enumerated via staining with SYBR Green I and flow cytometry. The  
401 cryopreserved sample was subsequently diluted with nutrient-amended sterile seawater growth  
402 medium to two different concentrations: 2.5 and 52.5 cells  $\text{mL}^{-1}$ . The 2.5 cells  $\text{mL}^{-1}$  dilution was  
403 used to create 480 2-mL dilution cultures (5-cell inoculum) in custom fabricated 96-well Teflon  
404 microtiter plates, while the 52.5 cells  $\text{mL}^{-1}$  dilution was used to create 470 2-mL dilution cultures  
405 (105-cell inoculum). Ten control wells containing uninoculated sterile seawater growth medium  
406 were also included. Teflon plates were sealed with breathable polypropylene microplate adhesive  
407 film (VWR) and incubated at  $27^{\circ}\text{C}$  in the dark. Growth was monitored at 2, 3, and 5 weeks post-  
408 inoculation as described above. Dilution cultures from the 5-cell inoculum showing positive  
409 growth ( $>10^4$  cells  $\text{mL}^{-1}$ ) after 5 weeks of incubation were subcultured by distributing 1 mL of  
410 initial culture into 20 mL of sterile seawater growth medium, and monitored for growth during  
411 incubation for up to 10 weeks at  $27^{\circ}\text{C}$  in the dark. This experiment is hereafter referred to as  
412 HTC2018.

413 Subcultures from the 5-cell cryopreserved seawater inoculum that reached  $>10^4$  cells  
414  $\text{mL}^{-1}$  were cryopreserved (500  $\mu\text{L}$  of culture with 10% v/v glycerol, final concentration) as  
415 described above. Cells in the remaining volume (~18 mL) were collected by filtration through



416 0.03  $\mu\text{m}$  pore-sized PES membrane filters (Sterlitech), submerged in 250  $\mu\text{L}$  DNA lysis buffer,  
417 and subsequently stored at  $-80^{\circ}\text{C}$  until DNA extraction.

418 The 105-cell inoculum was not subcultured. Instead, wells from one 96-well microtiter  
419 plate that exhibited growth ( $>10^{-4}$  cells  $\text{mL}^{-1}$ ) were cryopreserved by combining glycerol solution  
420 to a final concentration of 10% v/v in 250  $\mu\text{L}$  of subculture and frozen as above. Cells in the  
421 remaining volume of subculture ( $\sim 1$  mL) were collected by filtration through 0.03  $\mu\text{m}$  pore-sized  
422 PES membrane filters (Sterlitech), submerged in 250  $\mu\text{L}$  DNA lysis buffer, and subsequently  
423 stored at  $-80^{\circ}\text{C}$  until DNA extraction.

424

#### 425 **DNA extraction and sequencing**

426 Genomic DNA was extracted from the environmental sample and all 5-cell subcultures  
427 that exhibited growth using the Qiagen DNeasy Blood & Tissue Kit following the  
428 manufacturer's instructions for bacterial cells (Qiagen, Germantown, Maryland, USA). Genomic  
429 DNA was extracted from one 96-well microtiter plate of the 105-cell cryopreserved seawater  
430 inoculum cultures that exhibited growth using the DNeasy 96 Blood & Tissue Kit (Qiagen) in  
431 accordance with the manufacturer's protocol. Genomic DNA from the environmental sample and  
432 all 5-cell subcultures was used as template for polymerase chain reaction (PCR) amplification  
433 (Bio Rad C1000 Touch, Bio Rad, Hercules, CA, USA) using barcoded 515F and 926R primers  
434 targeting the V4 region of the SSU rRNA gene (52) in a total reaction volume of 25  $\mu\text{L}$   
435 containing 2  $\mu\text{L}$  of genomic DNA template, 0.5  $\mu\text{L}$  each forward and reverse primer, 10  $\mu\text{L}$   
436 5PRIME HotMasterMix (Quantabio, Beverly, MA, USA), and 12  $\mu\text{L}$  of  $\text{H}_2\text{O}$ . The reaction  
437 included an initial denaturing step of 3 min at  $94^{\circ}\text{C}$  followed by 40 cycles of 45 sec at  $94^{\circ}\text{C}$ , 1  
438 min at  $50^{\circ}\text{C}$  and 1.5 min at  $72^{\circ}\text{C}$ , and a final extension of 10 min at  $72^{\circ}\text{C}$ .

439 A nested-PCR approach was used to amplify SSU rRNA gene fragments from genomic  
440 DNA recovered from the 105-cell inoculum cryopreserved seawater cultures. The first reaction  
441 employed bacterial 27FB (53) and 1492R (54) primers in a 25  $\mu$ L total reaction volume as  
442 described above. The reaction included an initial denaturing step of 3 min at 94°C followed by 35  
443 cycles of 30 sec at 94°C, 1 min at 50°C and 45 sec at 72°C, and a final extension of 18 min at  
444 72°C. PCR products from the first amplification were then used as template for a second  
445 amplification reaction using the barcoded 515F and 926R primers (52), using the same reaction  
446 conditions as described for the 5-cell inoculum samples.

447 All PCR products were quantified (Qubit 2.0, Invitrogen), pooled at a concentration of  
448 240 ng sample<sup>-1</sup>, and cleaned (QIAquick PCR Purification Kit, Qiagen). Pooled products were  
449 sequenced via three Illumina MiSeq 250 bp paired-end runs using v.2 reagent kits.

450

#### 451 **Sequence analysis**

452 The three Illumina MiSeq runs were each separately imported into QIIME2 v2019.4.0,  
453 demultiplexed, and paired ends were analyzed for sequence quality and merged (55). The  
454 DADA2 software package (56) was then used to denoise sequences, including removal of  
455 chimeras. Due to the low quality at the end of the sequences, 10 bases were truncated from the 3'  
456 end of the reverse reads. Sequence reads from the three runs were then merged post-denoising.  
457 Amplicon sequence variant (ASV) identities were defined by DADA2 for all reads that varied by  
458 at least one base pair. Taxonomy was assigned to each ASV using a Naïve Bayes classifier  
459 trained on the Silva rRNA v132 database (57) clustered at 99% similarity and subsequently  
460 modified manually based on phylogenetic analyses and the results of previous work. Denoised  
461 sequences, ASVs, and taxonomy classifications were imported into R v3.5 (58) using the

462 phyloseq v1.26.1 package (59) for additional manual curation as outlined below. Visualizations  
463 were created in R using ggplot2 (60) and in BioVenn (61).

464         The identities of ASVs found within the cultures and the environmental sample were  
465 assigned by QIIME2. For each culture, ASVs represented by fewer than 20 reads were discarded  
466 from the data set in order to account for potential sequencing error. Subsequently, the proportion  
467 of each ASV in an individual culture was calculated using the read count for that ASV divided  
468 by the total reads from the culture, post-curation. Cultures were functionally divided into three  
469 separate categories: “monocultures”, “mixed cultures”, and cultures with no discernable,  
470 dominant member. All cultures that consisted of  $\geq 90\%$  of reads from a single ASV and contained  
471 no other ASVs that were  $\geq 5\%$  of reads were categorized as “monocultures”, and that ASV was  
472 assigned a unique isolate identifier in the Hawai‘i Institute of Marine Biology Culture Collection  
473 (prefix “HIMB”, followed by unique number). Cultures were defined as “mixed” if they (i)  
474 contained an ASV that accounted for  $< 90\%$  but  $\geq 50\%$  of the total reads for that particular  
475 culture. This ASV, as well as any other ASV within the mixed culture that contained  $> 5\%$  of the  
476 total reads, were assigned unique HIMB identification numbers. (ii) The culture consisted of  
477  $\geq 90\%$  of reads from a single ASV and an additional ASV that was  $\geq 5\%$  of reads. Each of these  
478 were also assigned unique HIMB identification numbers. The final category consisted of culture  
479 wells that contained no ASVs accounting for  $\geq 50\%$  of the total reads; these were not considered  
480 further in the context of this study.

481

## 482 **Analysis of environmental sample**

483         All ASVs represented by  $< 20$  reads in the environmental sample were removed in order  
484 to account for sequencing error and artifacts. All ASVs that were taxonomically identified as

485 “chloroplast” at the bacterial order-level in the Silva taxonomy were also removed from the data  
486 set. The relative abundance of each remaining ASV was calculated as the read count of the  
487 individual ASV divided by the total number of reads in the environmental sample, post-curation.  
488 Unique identifiers were assigned to all ASVs that remained in the dataset post-curation.

489

## 490 **Culturability statistics**

491 Fundamental culturability statistics were derived as outlined previously (16). Briefly,  
492 percent viability (culturability),  $V$ , is defined as the ratio of the number of viable cells to the total  
493 number of cells initially present. It was calculated using the formula:

$$494 \quad V = -\ln(1-p)/X$$

495 Where  $p$  is the proportion of wells that scored positive for growth and  $X$  is the number of cells  
496 used for the initial inoculation. To obtain 95% confidence intervals, the exact upper and lower  
497 95% confidence limits for  $p$  were calculated and inserted back into the original viability equation  
498 in place of  $p$ . The result is the exact upper and lower 95% confidence limits for percent  
499 culturability. For this experiment,  $p$  is defined as the number of cultures that were determined to  
500 be either monocultures or mixed cultures as described above. Two separate culturability statistics  
501 were calculated: one including mono- and mixed cultures, and one only including monocultures.

502

## 503 **Phylogenetic analyses**

504 Amplicon sequences corresponding to all ASVs were imported into the ARB software  
505 package (62) and aligned to a curated database of marine bacterial 16S rRNA gene sequences.  
506 Phylogenetic analyses were performed using the RAxML maximum likelihood method with the  
507 GTR model of nucleotide substitution under the gamma and invariable- models of rate

508 heterogeneity (63). The heat map of ASV relative abundance was constructed in R v.3.5 (58)  
509 using the ggplot2 package (60).

510

511 **Data availability**

512 Amplicon sequencing data are available in the Sequencing Read Archive (SRA) under bioproject  
513 number xxxxxxxx.

514

515

516 **Acknowledgements**

517 We thank the Center for Genomic Research and Biocomputing at Oregon State University for  
518 DNA sequencing, and Dr. Catherine M. Foley for her generous help with the creation of the  
519 maps used in Figure 1. This research was supported by funding from the National Science  
520 Foundation (grant OCE-1538628 to MSR), the Hawai‘i Institute of Marine Biology (Lord  
521 Scholarship fund and graduate research assistantship to EM), and the University of Hawai‘i  
522 Marine Biology Graduate Program (to EM). This is SOEST contribution xxx and HIMB  
523 contribution xxx.

524

525

526 **References**

- 527 1. Baker BJ, Dick GJ. 2013. Omic approaches in microbial ecology: charting the unknown.  
528 *Microbe* 8:353–360.
- 529 2. Solden L, Lloyd KG, Wrighton K. 2016. The bright side of microbial dark matter: Lessons  
530 learned from the uncultivated majority. *Curr Opin Microbiol* 31:217-226.
- 531 3. Tsementzi D, Wu J, Deutsch S, Nath S, Rodriguez-R LM, Burns AS, Ranjan P, Sarode N,  
532 Malmstrom RR, Padilla CC, Stone BK, Bristow LA, Larsen M, Glass JB, Thamdrup B,  
533 Woyke T, Konstantinidis KT, Stewart FJ. 2016. SAR11 bacteria linked to ocean anoxia  
534 and nitrogen loss. *Nature* 536:179–183.
- 535 4. Durham BP, Boysen AK, Carlson LT, Groussman RD, Heal KR, Cain KR, Morales RL,  
536 Coesel SN, Morris RM, Ingalls AE, Armbrust EV. 2019. Sulfonate-based networks  
537 between eukaryotic phytoplankton and heterotrophic bacteria in the surface ocean. *Nat*  
538 *Microbiol* 4:1706–1715.
- 539 5. Giovannoni SJ, Stingl U. 2007. The importance of culturing bacterioplankton in the  
540 “omics” age. *Nat Rev Microbiol* 5:820-826.
- 541 6. Rappé MS. 2013. Stabilizing the foundation of the house that ’omics builds: The evolving  
542 value of cultured isolates to marine microbiology. *Curr Opin Microbiol* 16:618-624.
- 543 7. Carini P. 2019. A “cultural” renaissance: genomics breathes new life into an old craft.  
544 *mSystems* 4:e00092-19.
- 545 8. Thrash JC. 2019. Culturing the uncultured: risk versus reward. *mSystems* 4:e00130-19.
- 546 9. Gifford SM, Sharma S, Booth M, Moran MA. 2013. Expression patterns reveal niche  
547 diversification in a marine microbial assemblage. *ISME J* 7:281–298.
- 548 10. Yooseph S, Nealson KH, Rusch DB, McCrow JP, Dupont CL, Kim M, Johnson J,

- 549 Montgomery R, Ferriera S, Beeson K, Williamson SJ, Tovchigrechko A, Allen AE,  
550 Zeigler LA, Sutton G, Eisenstadt E, Rogers YH, Friedman R, Frazier M, Venter JC. 2010.  
551 Genomic and functional adaptation in surface ocean planktonic prokaryotes. *Nature*  
552 468:60–66.
- 553 11. Lloyd KG, Steen AD, Ladau J, Yin J, Crosby L. 2018. Phylogenetically novel uncultured  
554 microbial cells dominate Earth microbiomes. *mSystems* 3:e00055-18.
- 555 12. Zengler K, Toledo G, Rappé M, Elkins J, Mathur EJ, Short JM, Keller M. 2002.  
556 Cultivating the uncultured. *Proc Natl Acad Sci U S A* 99:15681–15686.
- 557 13. Kaeberlein T, Lewis K, Epstein SS. 2002. Isolating “uncultivable” microorganisms in  
558 pure culture in a simulated natural environment. *Science* 296:1127–1129.
- 559 14. Aoi Y, Kinoshita T, Hata T, Ohta H, Obokata H, Tsuneda S. 2009. Hollow-fiber  
560 membrane chamber as a device for in situ environmental cultivation. *Appl Environ*  
561 *Microbiol* 75:3826–3833.
- 562 15. Vartoukian SR, Palmer RM, Wade WG. 2010. Strategies for culture of ‘unculturable’  
563 bacteria. *FEMS Microbiol Lett* 309:1–7.
- 564 16. Button DK, Schut F, Quang P, Martin R, Robertson BR. 1993. Viability and isolation of  
565 marine bacteria by dilution culture: theory, procedures, and initial results. *Appl Environ*  
566 *Microbiol* 59:881–891.
- 567 17. Schut F, de Vries EJ, Gottschal JC, Robertson BR, Harder W, Prins RA, Button DK.  
568 1993. Isolation of typical marine bacteria by dilution culture: growth, maintenance, and  
569 characteristics of isolates under laboratory conditions. *Appl Environ Microbiol* 59:2150–  
570 2160.
- 571 18. Schut F, Gottschal JC, Prins RA. 1997. Isolation and characterisation of the marine



- 572 ultramicrobacterium *Sphingomonas* sp. strain RB2256. FEMS Microbiol Rev 20:363–369.
- 573 19. Connon SA, Giovannoni SJ. 2002. High-throughput methods for culturing  
574 microorganisms in very-low-nutrient media yield diverse new marine isolates. Appl  
575 Environ Microbiol 68:3878–3885.
- 576 20. Rappé MS, Connon SA, Vergin KL, Giovannoni SJ. 2002. Cultivation of the ubiquitous  
577 SAR11 marine bacterioplankton clade. Nature 418:630–633.
- 578 21. Morris RM, Rappé MS, Connon SA, Vergin KL, Siebold WA, Carlson CA, Giovannoni  
579 SJ. 2002. SAR11 clade dominates ocean surface bacterioplankton communities. Nature  
580 420:806–810.
- 581 22. Giovannoni SJ, Britschgi TB, Moyer CL, Field KG. 1990. Genetic diversity in Sargasso  
582 Sea bacterioplankton. Nature 345:60–63.
- 583 23. Stingl U, Tripp HJ, Giovannoni SJ. 2007. Improvements of high-throughput culturing  
584 yielded novel SAR11 strains and other abundant marine bacteria from the Oregon coast  
585 and the Bermuda Atlantic Time Series study site. ISME J 1:361–371.
- 586 24. Song J, Oh HM, Cho JC. 2009. Improved culturability of SAR11 strains in dilution-to-  
587 extinction culturing from the East Sea, West Pacific Ocean. FEMS Microbiol Lett  
588 295:141–147.
- 589 25. Oh HM, Kang I, Lee K, Jang Y, Lim S Il, Cho JC. 2011. Complete genome sequence of  
590 strain IMCC9063, belonging to SAR11 subgroup 3, isolated from the Arctic Ocean. J  
591 Bacteriol 193:3379–3380.
- 592 26. Grote J, Cameron Thrash J, Huggett MJ, Landry ZC, Carini P, Giovannoni SJ, Rappé MS.  
593 2012. Streamlining and core genome conservation among highly divergent members of  
594 the SAR11 clade. MBio 3: e00252-12.

- 595 27. Henson MW, Celeste Lanclos V, Pitre DM, Lee Weckhorst J, Cheng C, Temperton B,  
596 Cameron Thrash J. 2020. Expanding the diversity of bacterioplankton isolates and  
597 modeling isolation efficacy with large scale dilution-to-extinction cultivation. *Appl*  
598 *Environ Microbiol* 86:1104-1123.
- 599 28. Jimenez-Infante F, Ngugi DK, Vinu M, Blom J, Alam I, Bajic VB, Stingl U. 2017.  
600 Genomic characterization of two novel SAR11 isolates from the Red Sea, including the  
601 first strain of the SAR11 Ib clade. *FEMS Microbiol Ecol* 93.
- 602 29. Huggett MJ, Hayakawa DH, Rappé MS. 2012. Genome sequence of strain HIMB624, a  
603 cultured representative from the OM43 clade of marine Betaproteobacteria. *Stand*  
604 *Genomic Sci* 6:11-20.
- 605 30. Grote J, Bayindirli C, Bergauer K, de Moraes PC, Chen H, D'Ambrosio L, Edwards B,  
606 Fernández-Gómez B, Hamisi M, Logares R, Nguyen D, Rii YM, Saeck E, Schutte C,  
607 Widner B, Church MJ, Steward GF, Karl DM, Delong EF, Eppley JM, Schuster SC,  
608 Kyrpides NC, Rappé MS. 2011. Draft genome sequence of strain HIMB100, a cultured  
609 representative of the SAR116 clade of marine Alphaproteobacteria. *Stand Genomic Sci*  
610 5:269–278.
- 611 31. Cho JC, Giovannoni SJ. 2004. Cultivation and growth characteristics of a diverse group of  
612 oligotrophic marine Gammaproteobacteria. *Appl Environ Microbiol* 70:432–440.
- 613 32. Marshall KT, Morris RM. 2013. Isolation of an aerobic sulfur oxidizer from the  
614 SUP05/Arctic96BD-19 clade. *ISME J* 7:452–455.
- 615 33. Carini P, Steindler L, Beszteri S, Giovannoni SJ. 2013. Nutrient requirements for growth  
616 of the extreme oligotroph “*Candidatus Pelagibacter ubique*” HTCC1062 on a defined  
617 medium. *ISME J* 7:592–602.

- 618 34. White AE, Giovannoni SJ, Zhao Y, Vergin K, Carlson CA. 2019. Elemental content and  
619 stoichiometry of SAR11 chemoheterotrophic marine bacteria. *Limnol Oceanogr Lett*  
620 4:44–51.
- 621 35. Huggett MJ, Rappé MS. 2012. Genome sequence of strain HIMB55, a novel marine  
622 gammaproteobacterium of the OM60/NOR5 clade. *J Bacteriol* 194:2393–2394.
- 623 36. Durham BP, Grote J, Whittaker KA, Bender SJ, Luo H, Grim SL, Brown JM, Casey JR,  
624 Dron A, Florez-Leiva L, Krupke A, Luria CM, Mine AH, Nigro OD, Pather S, Talarmin  
625 A, Wear EK, Weber TS, Wilson JM, Church MJ, DeLong EF, Karl DM, Steward GF,  
626 Eppley JM, Kyrpides NC, Schuster S, Rappé MS. 2014. Draft genome sequence of marine  
627 alphaproteobacterial strain HIMB11, the first cultivated representative of a unique lineage  
628 within the Roseobacter clade possessing an unusually small genome. *Stand Genomic Sci*  
629 9:632–645.
- 630 37. Haro-Moreno JM, Rodriguez-Valera F, Rosselli R, Martinez-Hernandez F, Roda-Garcia  
631 JJ, Gomez ML, Fornas O, Martinez-Garcia M, López-Pérez M. 2020. Ecogenomics of the  
632 SAR11 clade. *Environ Microbiol* 22:1748–1763.
- 633 38. Delmont TO, Kiefl E, Kilinc O, Esen OC, Uysal I, Rappé MS, Giovannoni S, Eren AM.  
634 2019. Single-amino acid variants reveal evolutionary processes that shape the  
635 biogeography of a global SAR11 subclade. *Elife* 8:e46497.
- 636 39. Steindler L, Schwalbach MS, Smith DP, Chan F, Giovannoni SJ. 2011. Energy starved  
637 *Pelagibacter ubique* substitutes light-mediated ATP production for  
638 endogenous carbon respiration. *PLoS One* 6:e19725.
- 639 40. Carini P, Van Mooy BAS, Thrash JC, White A, Zhao Y, Campbell EO, Fredricks HF,  
640 Giovannoni SJ. 2015. SAR11 lipid renovation in response to phosphate starvation. *Proc*

- 641 Natl Acad Sci U S A 112:7767–7772.
- 642 41. Carlson CA, Morris R, Parsons R, Treusch AH, Giovannoni SJ, Vergin K. 2009. Seasonal  
643 dynamics of SAR11 populations in the euphotic and mesopelagic zones of the  
644 northwestern Sargasso Sea. *ISME J* 3:283–295.
- 645 42. Morris RM, Frazar CD, Carlson CA. 2012. Basin-scale patterns in the abundance of  
646 SAR11 subclades, marine Actinobacteria (OM1), members of the Roseobacter clade and  
647 OCS116 in the South Atlantic. *Environ Microbiol* 14:1133–1144.
- 648 43. Ngugi DK, Antunes A, Brune A, Stingl U. 2012. Biogeography of pelagic  
649 bacterioplankton across an antagonistic temperature-salinity gradient in the Red Sea. *Mol*  
650 *Ecol* 21:388–405.
- 651 44. Giovannoni SJ, Hayakawa DH, Tripp HJ, Stingl U, Givan SA, Cho JC, Oh HM, Kitner  
652 JB, Vergin KL, Rappé MS. 2008. The small genome of an abundant coastal ocean  
653 methylotroph. *Environ Microbiol* 10:1771–1782.
- 654 45. Paerl RW, Sundh J, Tan D, Svenningsen SL, Hylander S, Pinhassi J, Andersson AF,  
655 Riemann L. 2018. Prevalent reliance of bacterioplankton on exogenous vitamin B1 and  
656 precursor availability. *Proc Natl Acad Sci U S A* 115:E10447–E10456.
- 657 46. Garcia SL. 2016. Mixed cultures as model communities: hunting for ubiquitous  
658 microorganisms, their partners, and interactions. *Aquat Microb Ecol* 77:79–85.
- 659 47. Garcia SL, Buck M, Hamilton JJ, Wurzbacher C, Grossart H-P, McMahon KD, Eiler A.  
660 2018. Model communities hint at promiscuous metabolic linkages between ubiquitous  
661 free-living freshwater bacteria. *mSphere* 3:e00202-18.
- 662 48. Tripp HJ, Kitner JB, Schwalbach MS, Dacey JWH, Wilhelm LJ, Giovannoni SJ. 2008.  
663 SAR11 marine bacteria require exogenous reduced sulphur for growth. *Nature* 452:741–

- 664 744.
- 665 49. Suzuki MT, Béjà O, Taylor LT, DeLong EF. 2001. Phylogenetic analysis of ribosomal  
666 RNA operons from uncultivated coastal marine bacterioplankton. *Environ Microbiol*  
667 3:323–331.
- 668 50. Yeo SK, Huggett MJ, Eiler A, Rappé MS. 2013. Coastal bacterioplankton community  
669 dynamics in response to a natural disturbance. *PLoS One* 8:e56207.
- 670 51. Grant SR, Church MJ, Ferrón S, Laws EA, Rappé MS. 2019. Elemental composition,  
671 phosphorous uptake, and characteristics of growth of a SAR11 strain in batch and  
672 continuous culture. *mSystems* 4:e00218-18.
- 673 52. Parada AE, Needham DM, Fuhrman JA. 2016. Every base matters: Assessing small  
674 subunit rRNA primers for marine microbiomes with mock communities, time series and  
675 global field samples. *Environ Microbiol* 18:1403–1414.
- 676 53. Vergin KL, Urbach E, Stein JL, DeLong EF, Lanoil BD, Giovannoni SJ. 1998. Screening  
677 of a fosmid library of marine environmental genomic DNA fragments reveals four clones  
678 related to members of the order Planctomycetales. *Appl Environ Microbiol* 64:3075–3078.
- 679 54. Lane DJ. 1991. 16S/23S rRNA sequencing, p. 115–175. *In* Stackebrandt, E, Goodfellow,  
680 M (eds.), *Nucleic Acid Techniques in Bacterial Systematics*. John Wiley & Sons, New  
681 York.
- 682 55. Bolyen E, Rideout JR, Dillon MR, *et al.* 2019. Reproducible, interactive, scalable and  
683 extensible microbiome data science using QIIME 2. *Nat Biotechnol* 37:852-857.
- 684 56. Callahan BJ, McMurdie PJ, Rosen MJ, Han AW, Johnson AJA, Holmes SP. 2016.  
685 DADA2: High-resolution sample inference from Illumina amplicon data. *Nat Methods*  
686 13:581–583.

- 687 57. Quast C, Pruesse E, Yilmaz P, Gerken J, Schweer T, Yarza P, Peplies J, Glöckner FO.  
688 2013. The SILVA ribosomal RNA gene database project: improved data processing and  
689 web-based tools. *Nucleic Acids Res* 41:D590–D596.
- 690 58. R Core Team. 2013. R: A language and environment for statistical computing. R  
691 Foundation for Statistical Computing, Vienna, Austria.
- 692 59. McMurdie PJ, Holmes SP. 2013. phyloseq: An R package for reproducible interactive  
693 analysis and graphics of microbiome census data. *PLoS One* 8:e61217.
- 694 60. Wickham H. 2009. *ggplot2: elegant graphics for data analysis*. Springer-Verlag, New  
695 York.
- 696 61. Hulsen T, de Vlieg J, Alkema W. 2008. BioVenn - A web application for the comparison  
697 and visualization of biological lists using area-proportional Venn diagrams. *BMC*  
698 *Genomics* 9:488.
- 699 62. Ludwig W, Strunk O, Westram R, Richter L, Meier H, Buchner A, Lai T, Steppi S, Jobb  
700 G, Förster W, Brettske I, Gerber S, Ginhart AW, Gross O, Grumann S, Hermann S, Jost  
701 R, König A, Liss T, Lüßmann R, May M, Nonhoff B, Reichel B, Strehlow R, Stamatakis  
702 A, Stuckmann N, Vilbig A, Lenke M, Ludwig T, Bode A, Schleifer K-H. 2004. ARB: a  
703 software environment for sequence data. *Nucleic Acids Res* 32:1363–1371.
- 704 63. Stamatakis A. 2006. RAxML-VI-HPC: Maximum likelihood-based phylogenetic analyses  
705 with thousands of taxa and mixed models. *Bioinformatics* 22:2688–2690.
- 706

707 **Figure Legends**

708 **Figure 1.** Map indicating the location of stations STO1 (red triangle) and SR4 (black circle) in  
709 the vicinity of Kāneʻohe Bay on the island of Oʻahu, Hawaiʻi, where seawater used as inoculum  
710 (STO1) and media preparation (SR4) were collected.

711

712 **Figure 2.** Outline of experiments performed in this study.

713

714 **Figure 3.** Phylogenetic analysis of the SAR11 clade illustrating relationships among 16S rRNA  
715 gene ASVs recovered from isolates and the source seawater used as inoculum in this study. The  
716 scale bar corresponds to 0.1 substitutions per nucleotide position. A variety of  
717 *Alphaproteobacteria* were used as an outgroup. Previously cultured isolates (“str.”) and select  
718 environmental gene clones were included as references. Boxes labeled “Env” indicate the  
719 relative environmental abundance of each ASV (blue gradient), while orange (“2017”) and green  
720 (“2018”) boxes indicate the presence of an ASV in the fresh (HTC2017) and cryopreserved  
721 (HTC2018) seawater cultivation experiments respectively. Boxes containing a slash in the “Env”  
722 column indicate ASVs was found in a culture but were not detected in the environmental sample.

723

724 **Figure 4.** Venn diagrams comparing (A) SAR11 ASVs identified within the environmental  
725 seawater sample used as inoculum, isolates from the fresh seawater cultivation experiment  
726 (HTC2017), and isolates from the cryopreserved seawater cultivation experiment (HTC2018).  
727 (B) Same as (A), except limited to SAR11 subclade Ia ASVs.

728

729 **Figure 5.** Phylogenetic analysis of select lineages of *Alpha*- and *Gammaproteobacteria*  
730 illustrating relationships among 16S rRNA gene ASVs recovered from isolates and the source  
731 seawater used as inoculum in this study. The scale bar corresponds to 0.1 substitutions per  
732 nucleotide position. A variety of *Betaproteobacteria* were used as an outgroup. Previously  
733 cultured isolates (“str.”) and select environmental gene clones were included as references.  
734 Boxes labeled “Env” indicate the relative environmental abundance of each ASV (blue gradient),  
735 while orange (“2017”) and green (“2018”) boxes indicate the presence of an ASV in the fresh  
736 (HTC2017) and cryopreserved (HTC2018) seawater cultivation experiments respectively. Boxes  
737 containing a slash in the “Env” column indicate ASVs was found in a culture but were not  
738 detected in the environmental sample.

739

740 **Figure S1.** Relative abundance (bubble size) of ASVs identified in mixed cultures from  
741 cultivation experiments using fresh seawater (HTC2017, 5-cell inoculum) and cryopreserved  
742 seawater (HTC2018 5-cell and 105-cell inocula). Bar charts represent the number of  
743 monocultures matching these ASVs cultivated in the two experiments.

744



745 **TABLES**

746 **Table 1.** Culturability statistics from fresh (HTC2017) and cryopreserved (HTC2018) seawater  
747 cultivation experiments.

748

749 **Table 2.** Summary of isolates from fresh (HTC2017) and cryopreserved (HTC2018) seawater  
750 cultivation experiments, including the relative abundance of each taxonomic group in the  
751 environmental sample based on SSU rRNA gene sequencing.

752

753 **Table S1.** Summary of ASVs, mixed cultures, and isolates recovered in this study.

754

Table 1. Culturability statistics from fresh (HTC2017) and cryopreserved (HTC2018) seawater cultivation experiments.

| Inoculum source                | Inoculum size (cells) <sup>a</sup> | Inoculated cultures | Mono- & mixed cultures         |                                | Monocultures only              |                                |
|--------------------------------|------------------------------------|---------------------|--------------------------------|--------------------------------|--------------------------------|--------------------------------|
|                                |                                    |                     | Positive cultures <sup>b</sup> | Culturability (%) <sup>c</sup> | Positive cultures <sup>b</sup> | Culturability (%) <sup>c</sup> |
| HTC2017 fresh seawater         | 5                                  | 576                 | 83                             | 3.1 (2.5, 3.9)                 | 54                             | 2.0 (1.5, 2.6)                 |
| HTC2018 cryopreserved seawater | 5                                  | 480                 | 50                             | 2.2 (1.6, 2.9)                 | 39                             | 1.7 (1.2, 2.3)                 |
|                                | 105                                | 94                  | 38                             | 0.5 (0.3, 0.7)                 | 20                             | 0.2 (0.1, 0.4)                 |

<sup>a</sup>In a culture volume of 2 mL

<sup>b</sup>Calculated as the number of inoculated cultures that resulted in growth of either a monoculture or mixed culture (see Methods for definition). The constituent members of all mixed cultures are listed in Table S1.

<sup>c</sup>Ninety-five percent confidence intervals are shown in parentheses

Table 2. Summary of isolates from fresh (HTC2017) and cryopreserved (HTC2018) seawater cultivation experiments, including the relative abundance of each taxonomic group in the environmental sample based on SSU rRNA gene sequencing.

| Taxonomy <sup>a</sup>                                             | HTC2017 |         | HTC2018 |         | Seawater <sup>b</sup> |                    |
|-------------------------------------------------------------------|---------|---------|---------|---------|-----------------------|--------------------|
|                                                                   | ASVs    | Strains | ASVs    | Strains | ASVs                  | Abundance (rel. %) |
| Alphaproteobacteria, SAR11 subclade Ia                            | 9       | 47      | 9       | 68      | 10                    | 10.23              |
| Alphaproteobacteria, SAR11 subclade Ib                            | 2       | 4       | 2       | 3       | 14                    | 7.74               |
| Alphaproteobacteria, SAR11 subclade IIIa                          | 0       | 0       | 1       | 2       | 4                     | 0.42               |
| Alphaproteobacteria, SAR11 subclade Va                            | 0       | 0       | 1       | 1       | 2                     | 2.13               |
| Alphaproteobacteria, Rhodobacteraceae                             | 4       | 14      | 5       | 5       | 12                    | 5.81               |
| Alphaproteobacteria, SAR116 clade                                 | 1       | 1       | 0       | 0       | 23                    | 5.41               |
| Alphaproteobacteria, PS1 clade                                    | 1       | 3       | 3       | 4       | 3                     | 0.42               |
| Gammaproteobacteria, Halieaceae, OM60(NOR5) clade                 | 4       | 24      | 5       | 21      | 5                     | 1.91               |
| Gammaproteobacteria, KI89A clade                                  | 1       | 1       | 0       | 0       | 4                     | 0.60               |
| Betaproteobacteriales, Burkholderia-Caballeronia-Paraburkholderia | 1       | 4       | 1       | 1       | 2                     | 0.11               |
| Betaproteobacteriales, Methylophilaceae, OM43 clade               | 2       | 5       | 0       | 0       | 1                     | 0.04               |
| Gammaproteobacteria, Pseudomonadaceae, Pseudomonas                | 1       | 2       | 0       | 0       | 0                     | 0                  |
| Gammaproteobacteria, Rhodanobacteraceae                           | 1       | 2       | 0       | 0       | 0                     | 0                  |
| Actinobacteria, Corynebacteriaceae                                | 0       | 0       | 1       | 1       | 0                     | 0                  |
| Actinobacteria, Geodermatophilaceae                               | 0       | 0       | 1       | 1       | 0                     | 0                  |
| Bacteroidetes, Chitinophagaceae, Sediminibacterium                | 0       | 0       | 1       | 1       | 0                     | 0                  |
| Fungi                                                             | 1       | 1       | 1       | 2       | 0                     | 0                  |

<sup>a</sup>Abbreviated taxonomy adapted from Silva release 132; the full taxonomy of each ASV is available in Table S1.

<sup>b</sup>Environmental relative abundance was calculated using read counts of all environmental ASVs detected in the seawater sample from within each taxonomic grouping, after curation to remove ASVs originating from chloroplasts.

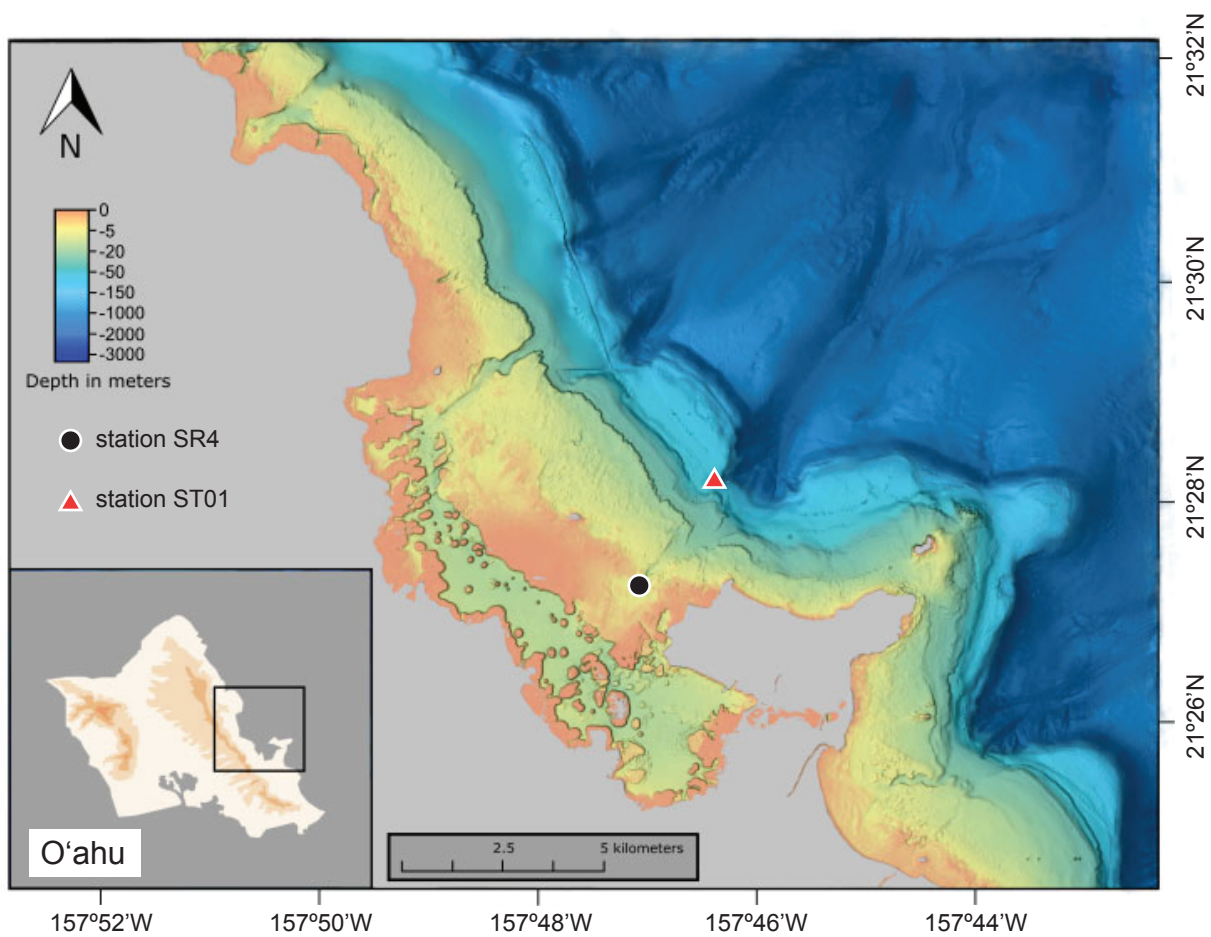

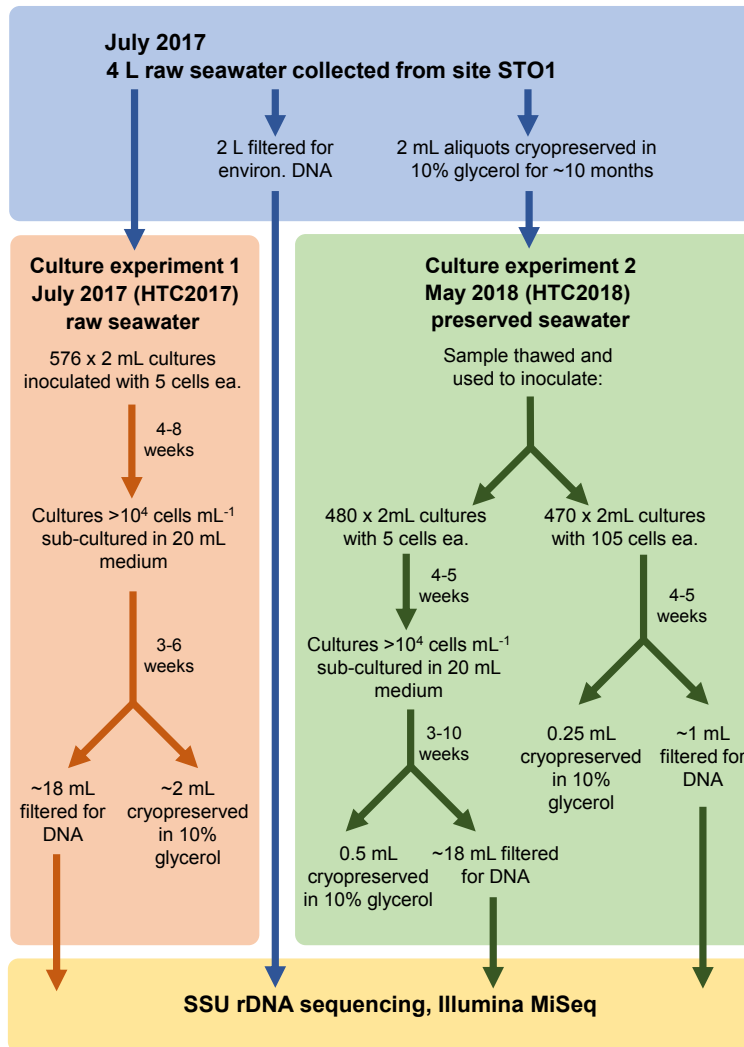

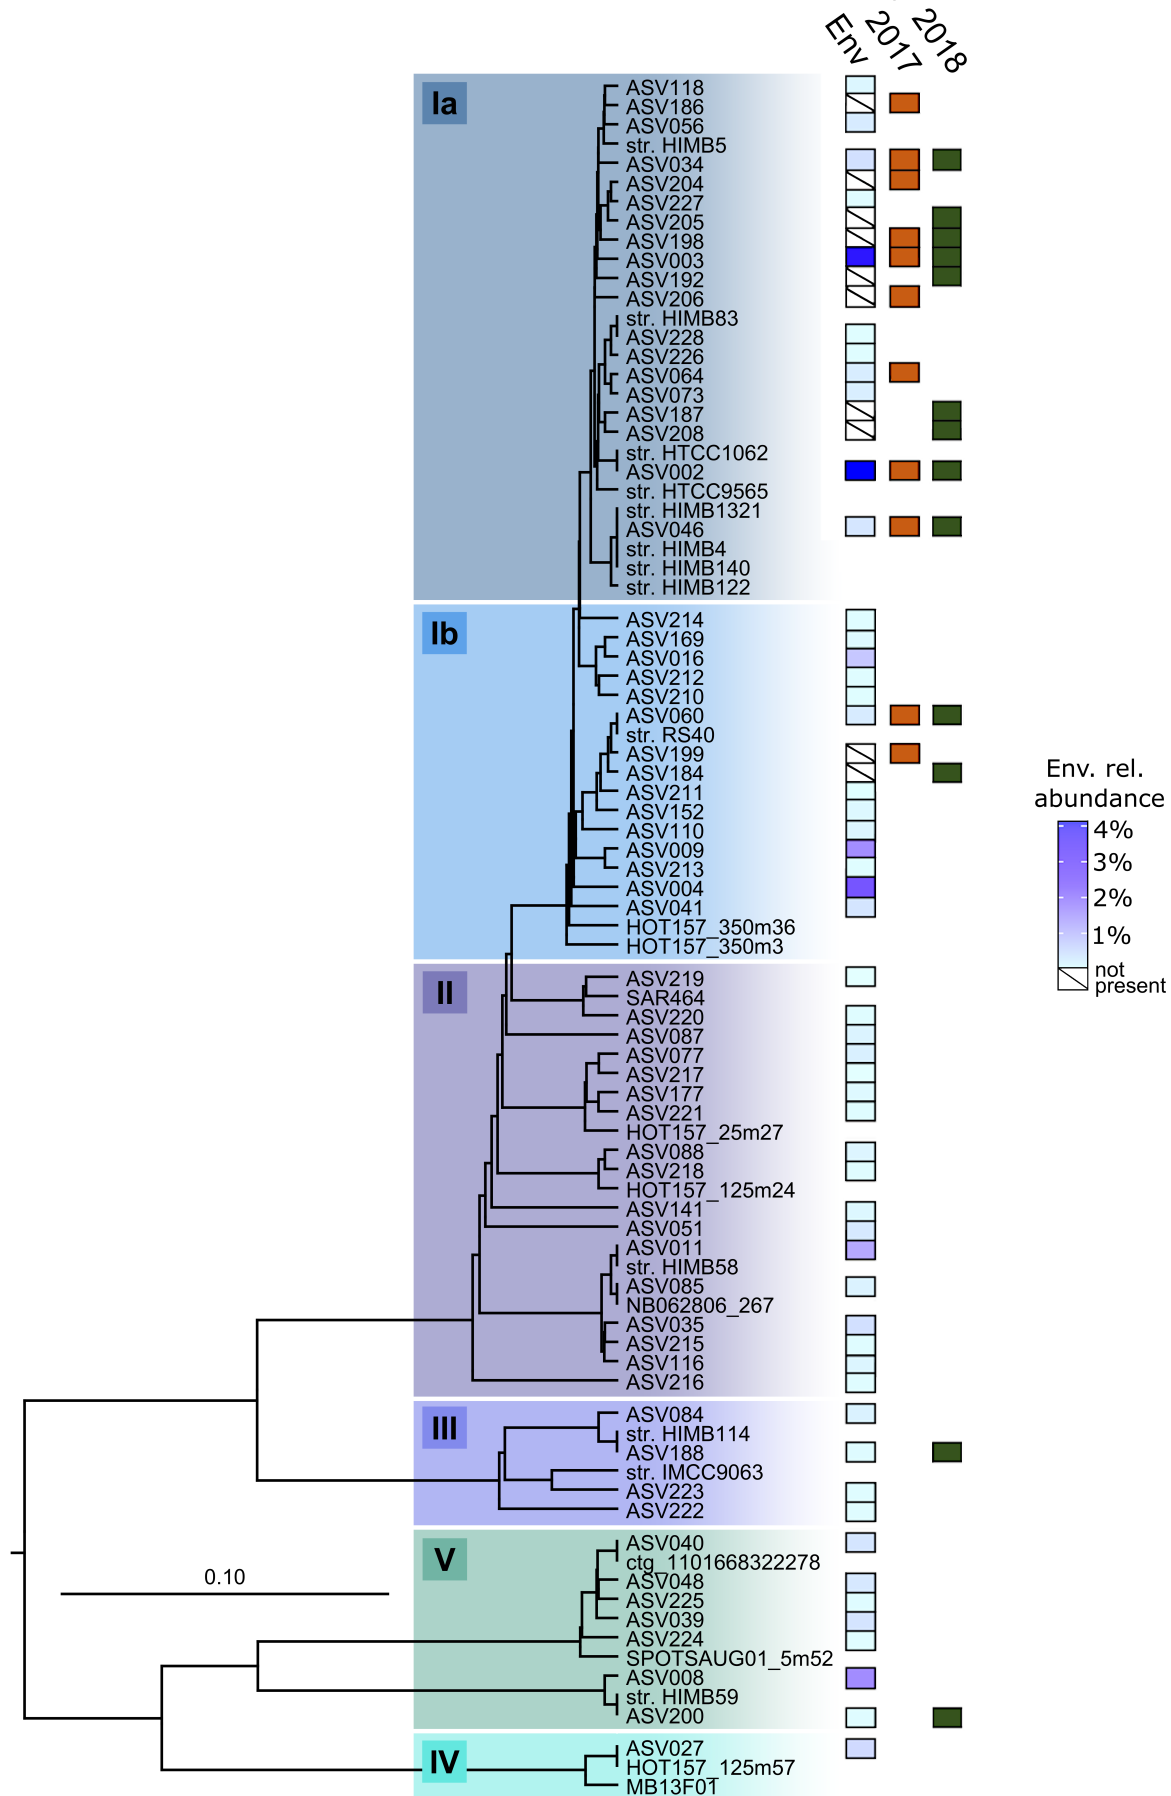

A. All SAR11 ASVs

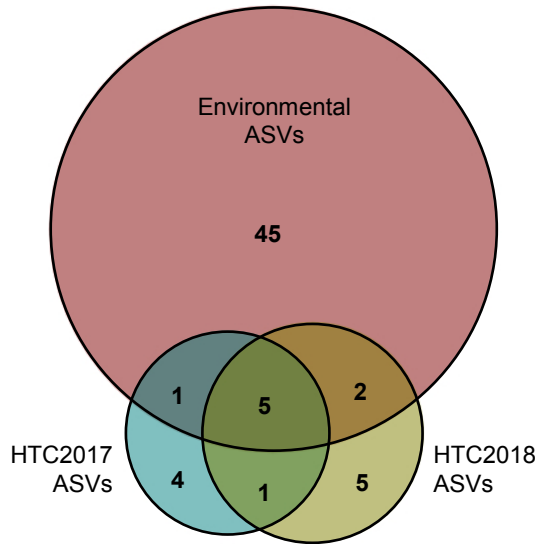

B. SAR11 subclade Ia ASVs

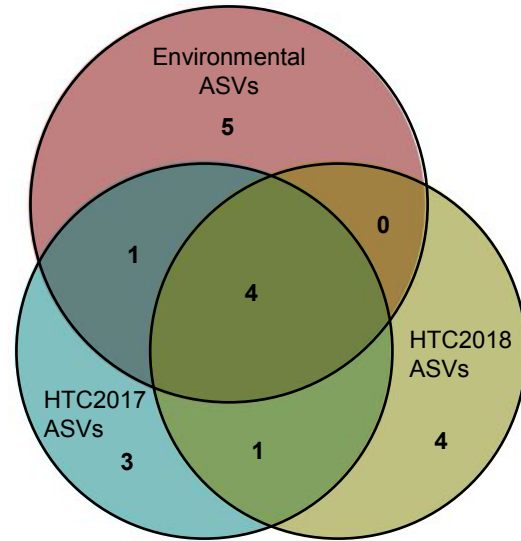

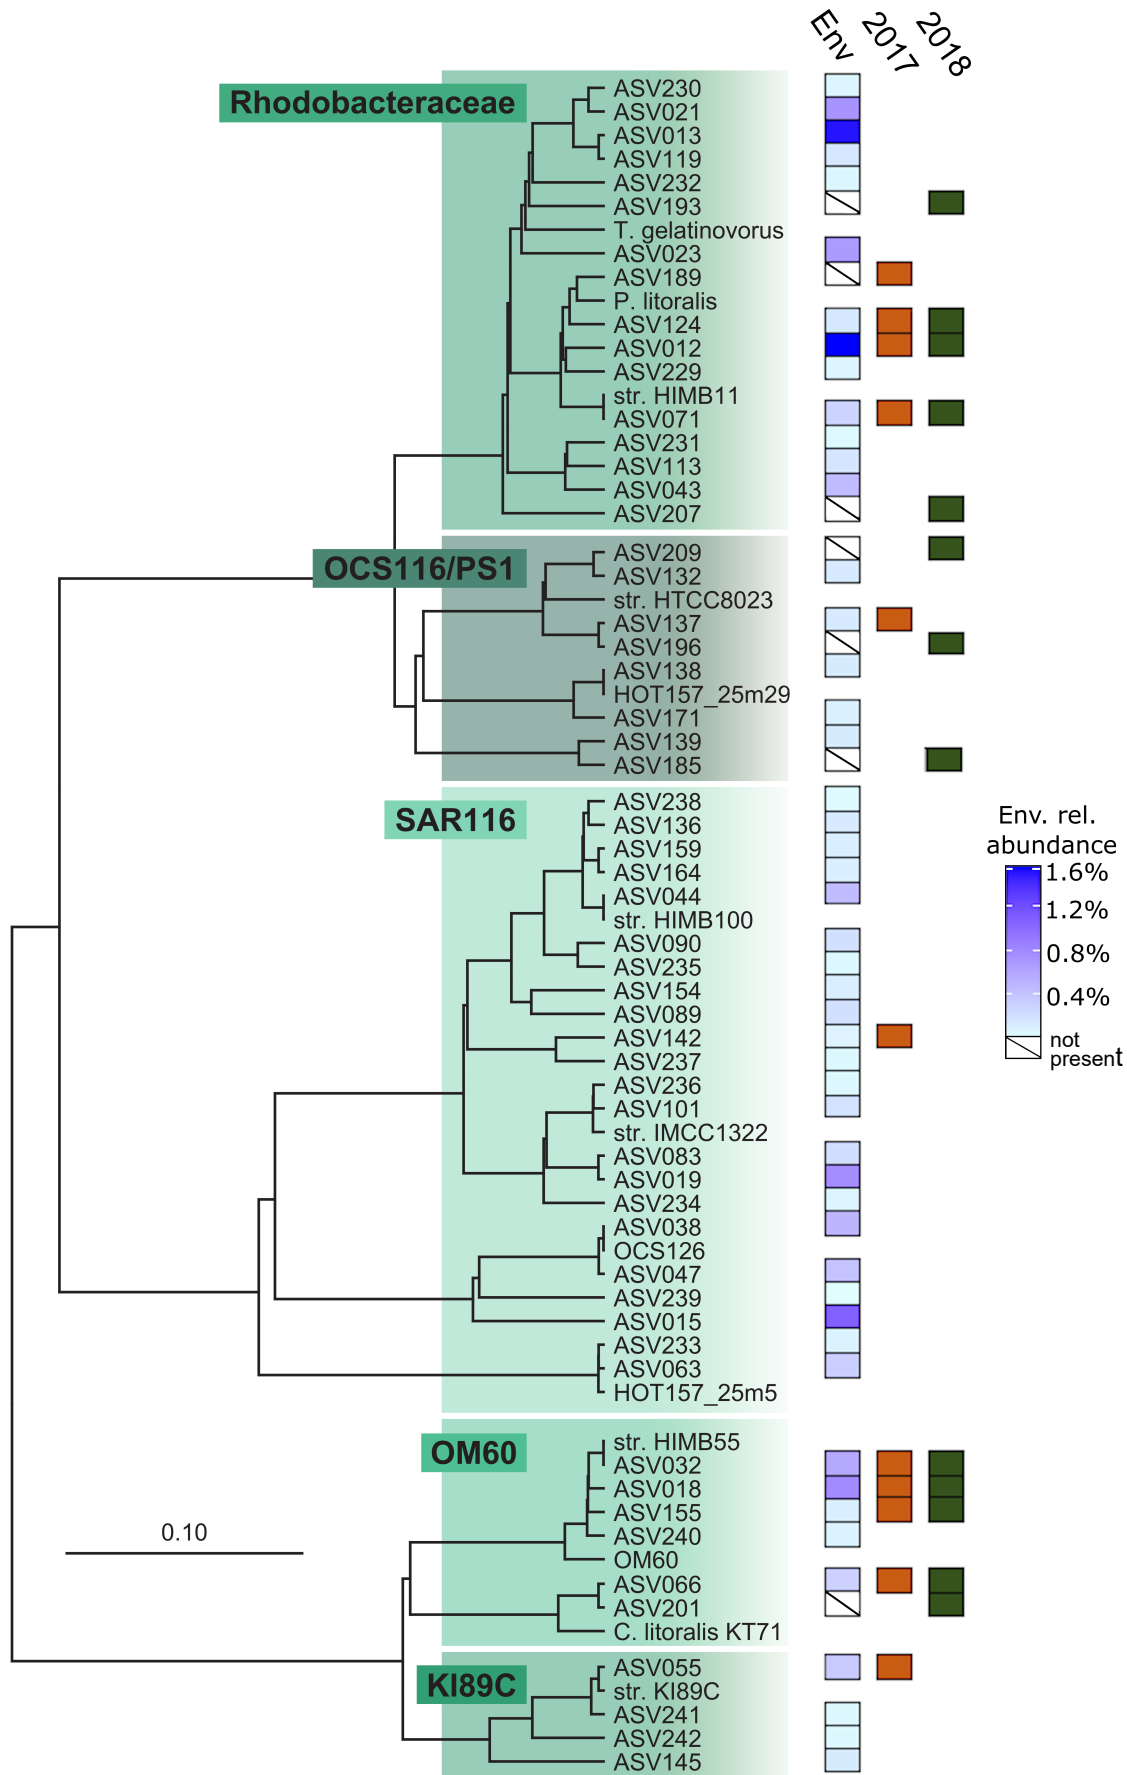



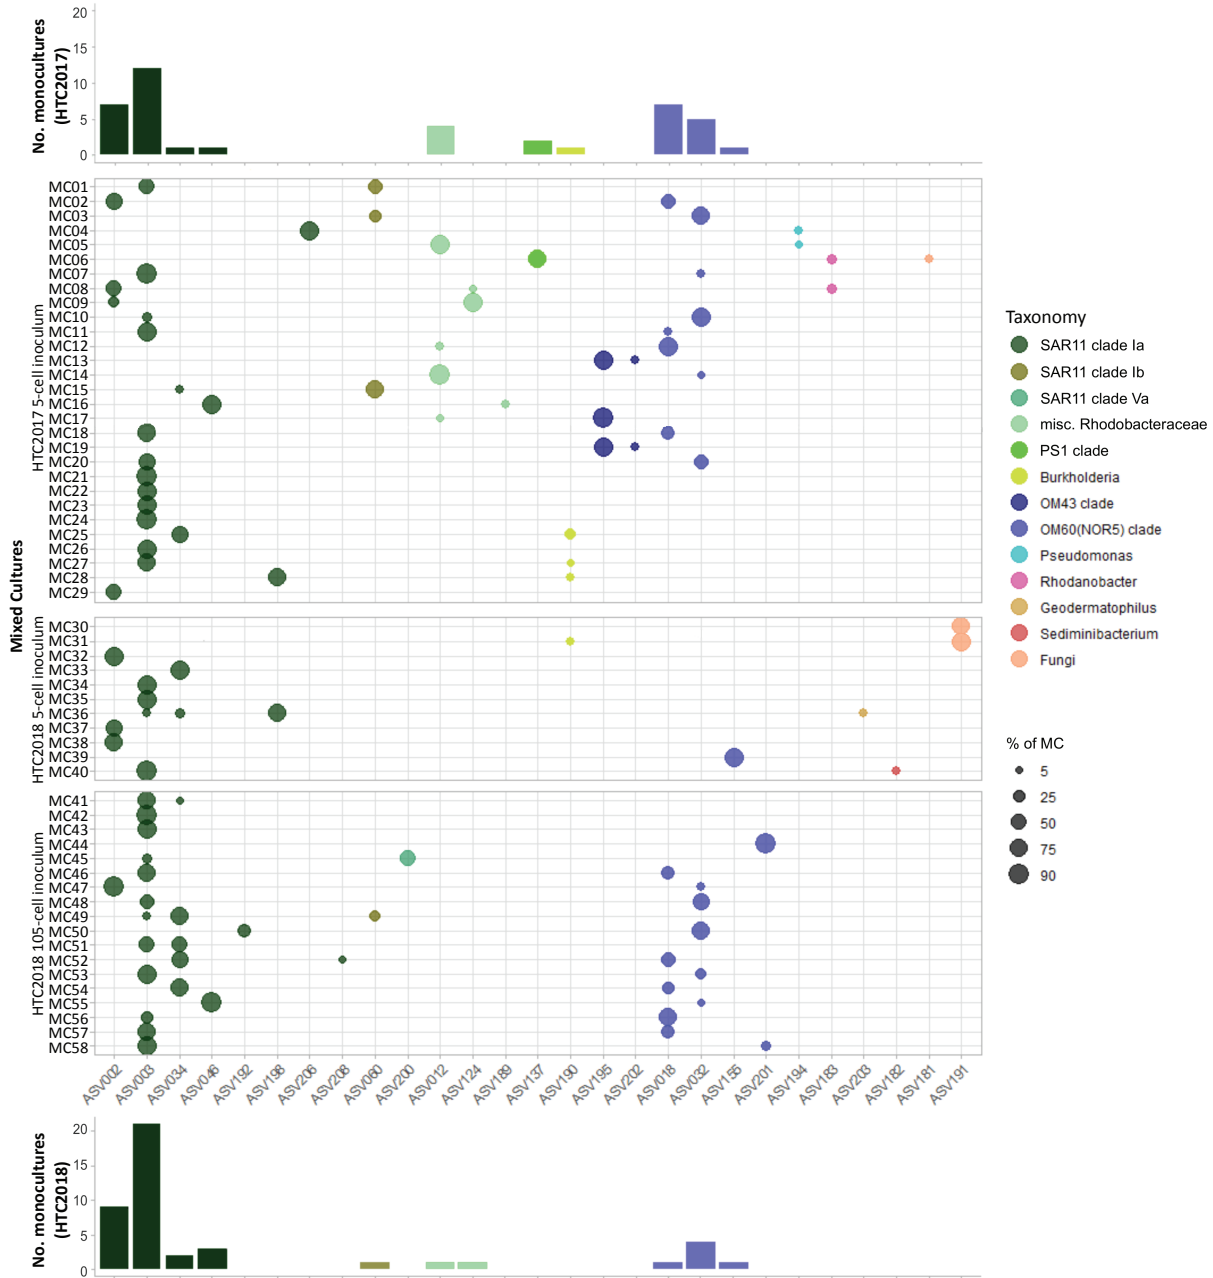

Source: http://biorxiv.org/content/10.1101/2020.09.22.309336v1.full.pdf
